# Supplementary material for: Characterization of the Exometabolome of Nitrosopumilus maritimus SCM1 by Liquid Chromatography–Ion Mobility Mass Spectrometry
Source: Front Microbiol. 2021 Jul 1;12:658781. doi: 10.3389/fmicb.2021.658781 (PMC8281238; doi:10.3389/fmicb.2021.658781)
Supplement: Supplementary file 7 [file Table_7.XLSX]

## Sheet: Sheet1
Compound	Description	Chemical Classifications	Comments	Archaeal or SCM1 metabolite
2.65_340.1065m/z	6-methylthioinosine	Purine nucleosides	A thiopurine that is inosine in which the aromatic hydroxy group is replaced by a methylsulfanediyl group.
2.72_330.0586m/z	2-deoxy-2,3-dehydro-N-acetylneuraminic acid	Secondary alcohols	Inhibitor of bacterial, viral, and mammalian neuraminidases that cleave sialic acid occurring on the surfaces of cells in humans and other animals and in plants and microorganisms.
2.79_412.1685m/z	N6-(5-Aminopentyl)-9-(D-ribofuranosyl)-9H-purine-2,6-diamine	Purine nucleosides
2.80_257.0876m/z	L-prolyl-L-proline	Amino acids, peptides, and analogues	A dipeptide composed of proline and proline.
2.84_441.1414m/z	(6-carboxy-3,4,5-trihydroxyoxan-2-yl)[4-(2H-chromen-2-ylidene)cyclohexa-2,5-dien-1-ylidene]oxidanium	Carbohydrates and carbohydrate conjugates	A predicted metabolite, a glucuronic acid derivative. Glucuronic acid derivatives are compounds containing a glucuronic acid moiety (or a derivative), which consists of a glucose moiety with the C6 carbon oxidized to a carboxylic acid.
2.86_364.1587m/z	(R)-Pantothenic acid 4'-O-b-D-glucoside	Fatty acyl glycosides	A fatty acyl glycoside composed of a monosaccharide moiety linked to one hydroxyl group of a fatty alcohol.
2.87_418.1340m/z	Furaneol 4-(6-malonylglucoside)	Carbohydrates and carbohydrate conjugates	An O-glycosyl compound. These are glycoside in which a sugar group is bonded through one carbon to another group via a O-glycosidic bond.
2.97_457.1466m/z	Psychrophilin B	Amino acids, peptides, and analogues	A cyclic nitropeptide isolated from Penicillium rivulum.
3.20_549.2115m/z	Creatine riboside	Carbohydrates and carbohydrate conjugates	A conjugate between creatine and ribose that can be formed spontaneously by mixing creatine with ribose.
3.31_398.1283m/z	3-dehydro-2-deoxy-D-gluconic acid	Carbohydrates and carbohydrate conjugates	A sugar acid.
3.49_552.1811m/z	Strepoxepinmycin C	Naphthopyranones	An antibiotic added to the culture.
3.57_563.2268m/z	1-Ethyl-3-[2-(5-methoxy-1-benzofuran-3-yl)ethyl]urea	Benzofurans
3.80_558.2474m/z	L-Orn-D-Asp	Amino acids, peptides, and analogues	A dipeptide obtained by formal condensation of the carboxy group of L-ornithine with the amino group of D-aspartic acid. It is a constituent of bacterial peptidoglycan type A4β.
4.00_366.1377m/z	Amphistin	Amino acids, peptides, and analogues	A tripeptide.
4.01_441.1510m/z	8-amino-8-demethylriboflavin	Alloxazines and isoalloxazines	A benzopteridine that is riboflavin in which the methyl group at position 8 has been replaced by an amino group.
4.10_400.1261m/z	α-ribazole 5'-phosphate	Benzimidazole ribonucleosides and ribonucleotides	An intermediate in riboflavin (vitamin B2) metabolism; involved in porphyrin and chlorophyll metabolism (Vitamin B12 biosynethsis).	Y
4.16_325.1377m/z	γ-Glu-His	Amino acids, peptides, and analogues	A dipeptide that is the conjugate base of γ-Glu-His.
4.43_147.0908m/z	Methyl (2E)-3-(1,3-dimethyl-2,3-dihydro-1H-imidazol-4-yl)acrylate	Imidazoles	An imidazolyl carboxylic acids derivative.
4.85_130.0644m/z	Phenylalanine	Amino acids, peptides, and analogues	An amino acid.
4.96_597.2838m/z	N-(3-Amino-1-carboxypropyl)-L-alanyl-L-proline	Amino acids, peptides, and analogues	A dipeptide.
5.09_604.2935m/z	Epothilone B 3-ɑ-D- arabinofuranoside	Epothilones and analogues	An epothilone metabolite.
5.14_414.1369m/z	(4R)-2-(1,3-Diphenyl-1H-pyrazol-4-yl)-1,3-thiazolidine-4-carboxamide	Pyrazoles	A phenylpyrazole.
5.20_412.1228m/z	N2-(1,3-Benzodioxol-5-yl)-N1-(4-methylphenyl)-1,2-pyrrolidinedicarboxamide	Amino acids and derivatives	A proline derivative
5.33_507.2054m/z	gentamycin A	Carbohydrates and carbohydrate conjugates	Aminocyclitol glycoside; a gentamycin; antimicrobial
5.78_565.2231m/z	5-(2-aminoethyl)-2'-deoxyuridine	Pyrimidine 2'-deoxyribonucleosides	A pyrimidine 2'-deoxyribonucleoside that is 2'-deoxyuridine in which the hydrogen at position 5 has been replaced by a 2-aminoethyl group.
5.83_598.2853m/z	7,8-Dihydrovomifoliol 9-[rhamnosyl-(1->6)-glucoside]	Fatty acyl glycosides	Dehydrovomifoliol is a fenchane monoterpenoid, with a disaccharide moiety linked to one hydroxyl group of a fatty alcohol.
5.84_776.3875m/z	Zaragozic acid F	Pentacarboxylic acids and derivatives	A zaragozic acid from Leptodontidium elatius.
6.00_1461.4371m/z	Vancomycin / chloroorienticin B	Amino acids, peptides, and analogues	An antibiotic added to the culture.
6.01_1110.3158m/z	(11Z,14Z)-3-oxoicosa-11,14-dienoyl-CoA	Fatty acyl thioesters	A long-chain 3-oxoacyl CoAs.
6.13_553.3305m/z	3-O-Acetyl-16a-hydroxytrametenolic acid	Triterpenoids	A lanostane-type triterpene acid.
6.58_313.1028m/z	4-Nitro-7-piperazinobenzofurazan	Piperazines	For HPLC derivatization
6.64_425.0861m/z	α-L-Rhap-(1→3)-β-D-Glcp-O[CH2]2SH	Carbohydrates and carbohydrate conjugates	A glycoside that consists of 2-sulfanylethyl β-D-glucoside having an α-L-rhamnosyl residue at the 3-position.
6.96_532.3268m/z	Bipolahydroquinone A	1-benzopyrans	A meroterpenoids from Lycium barbarum.
7.04_130.0645m/z	Phenylalanine	Amino acids, peptides, and analogues	An amino acid.
7.06_146.0592m/z	N-hydroxy-L-phenylalanine	Amino acids, peptides, and analogues	A phenylalanine derivative
7.31_357.1095m/z	(2Z,10Z)-3-hydroxy-5,17-dioxo-4,5-secoestra-2,10-diene-3-oic acid	An oxo seco-steroid	A meta-cleavage metabolite in the estrogen degradation pathway; an unstable precursor to pyridinestrone acid.
7.42_883.5055n	Sinulariapeptide A	Cyclic depsipeptides	Peptides from Simplicillium sp. SCSIO41209
7.88_636.3767m/z	Strevertene B	Macrolides and analogues	An antifungal pentaene macrolides produced by Streptoverticillcum LL-30F848.
8.14_174.0907m/z	Deacetyldemethylanisomycin	1-hydroxy-2-unsubstituted benzenoids
8.22_652.4069m/z	Chainin	Macrolides and analogues
8.38_328.1078n	[(5E)-5-(Methoxycarbonyl)-6-(4-methoxyphenyl)-5-hexen-1-yl]phosphonic acid	Cinnamic acid esters
8.41_722.4228n	Prosapogenin A	Steroidal glycosides	A natural product from Veratrum, induces apoptosis in human cancer cells in vitro via inhibition of the STAT3 signaling pathway and glycolysis.
8.42_489.3115m/z	netilmycin	Carbohydrates and carbohydrate conjugates	An aminocyclitol glycoside, with antimicrobial property
8.54_761.1983m/z	N-hydroxy-4-aminobiphenyl O-glucuronide	Carbohydrates and carbohydrate conjugates	A glucuronic acid derivative.
8.61_1231.2337m/z	6-(4-{5,7-dihydroxy-3-[(3,4,5-trihydroxyoxan-2-yl)oxy]-5H-chromen-2-yl}-2-hydroxyphenoxy)-3,4,5-trihydroxyoxane-2-carboxylic acid	Carbohydrates and carbohydrate conjugates	A predicted phenolic glycoside.
8.72_346.1010m/z	1,4,5,6-tetrahydro-6-oxonicotinic acid	Tetrahydropyridines	Involved in nicotinate and nicotinamide metabolism
8.86_841.5202n	Lagunamide A	Depsipeptides	A cyclodepsipeptide from the marine cyanobacterium Lyngbya majuscula.
9.16_540.2402m/z	Mullinamide A	Amino acids, peptides, and analogues	A cyclopeptide from Streptomyces sp. RM-27-46.
9.52_339.0974m/z	Cucurbitarin A	Carbonyl compounds	A cyclohexenone
9.59_736.4626m/z	6-Deoxy-13-cyclopropyl-erythromycin B	Carbohydrates and carbohydrate conjugates	An Aminoglycoside from Saccharopolyspora erythraea NRRL 18643
9.69_858.4789n	MBJ-0173	Amino acids, peptides, and analogues	An arginine-containing peptide.
9.88_842.5287m/z	Aurilide C	Depsipeptides	Cyclic depsipeptides.
9.90_634.4312m/z	6-Methyl-N-[1-(2-phenylethyl)-3-piperidinyl]-3-pyridazinamine	Phenethylamines
10.11_568.3114m/z	Trienomycin H	Amino acids and derivatives	An N-acyl-alpha amino acid derivative.
10.23_311.1044m/z	Methyl N-{[(7,7-dimethyl-2-oxobicyclo[2.2.1]hept-1-yl)methyl]sulfonyl}carbamimidate	Monoterpenoids	A bicyclic monoterpenoid.
10.23_370.1173n	Methyl 4-({4-[(2-hydroxybenzoyl)carbamoyl]phenyl}amino)-4-oxobutanoate	Benzoic acids and derivatives	N-benzylbenzamide.
10.26_538.2453m/z	Cis-3-(4-hydroxyphenyl)-4-isobutyldihydrofuran-2,5-dione	1-hydroxy-2-unsubstituted benzenoids	A phenol.
10.63_442.2375m/z	Cytochalasin A	Cytochalasins
10.67_389.1676m/z	3,4,5,6-tetrahydrohippuric acid	Amino acids, peptides, and analogues	An N-acylglycine.
10.82_311.2645m/z	Homoagmatine	Guanidines	High N:C
10.89_692.4732m/z	Bafilomycin H	Macrolides and analogues
11.30_480.2387m/z	Methoxydebromomarinone	Naphthopyranones
11.59_392.1663m/z	S-methyl-L-methionine	Amino acids, peptides, and analogues	A sulfonium compound, a methionine derivative. S-Methylmethionine is sometimes referred to as vitamin U, but it is not considered a true vitamin.
11.59_210.1481m/z	(1S,4R)-1-hydroxylimonen-2-one	Monoterpenoids	Involved in limonene and pinene degradation.
11.63_345.1314m/z	Annulohypoxyboverin	Fatty alcohols
11.97_426.2963m/z	Beauveriolide IV	Depsipeptides	A cyclic depsipeptide.
12.19_346.1264m/z	Balticol E	Tetralins	A naphthalenone derivative.
12.39_281.1144m/z	Phenylalanyl-Aspartate	Amino acids, peptides, and analogues	a dipeptide composed of phenylalanine and aspartic acid.
12.59_319.0958m/z	Betulinan B	2-benzopyrans	A benzoquinone derivative.
12.77_328.1521m/z	cetraxate	Phenylpropanoic acids	A cyclohexanecarboxylate ester.
12.78_320.1044m/z	Brevianamide N	Benzodiazines	An indole alkaloid dimer.
13.23_648.3746m/z	Nummularine A	Amino acids, peptides, and analogues	A cyclic peptide.
13.28_259.1314m/z	Oblongolide D	Naphthofurans
14.87_271.1312m/z	Dendryphiellin H	Sesquiterpenoids
14.91_620.5195n	CE(5M5)	Steroid esters	CE(5M5) is a furan fatty acid ester of cholesterol or simply a cholesteryl ester (CE).
14.94_536.3903m/z	24,24-difluoro-1alpha,25-dihydroxy-26,27-dimethyl-24a-homovitamin D3 / 24,24-difluoro-1alpha,25-dihydroxy-26,27-dimethyl-24a-homocholecalciferol	Vitamin D3 and derivatives
15.09_272.1629m/z	N,N-didesmethylvenlafaxine	Phenol ethers/ Anisoles	A marine xenobiotic metabolite.
15.29_224.1622m/z	11-amino-undecanoic acid	Amino fatty acids
15.57_314.9996m/z	cysteamine S-phosphate	Organothiophosphorus compounds	An organic thiophosphate.
15.75_395.1983m/z	(E)-2-Tridecene-4,6,8-triyn-1-ol	Fatty alcohols	A long-chain fatty alcohol.
15.95_273.1012m/z	Azacridone A	1-benzopyrans	A chromenopyridine.
15.96_299.1266m/z	Oxirapentyn B	Oxepanes
16.22_300.2082n	all-trans-4-hydroxyretinal	Retinoids	A retinoid first isolated from Watasenia scintillans, a marine metabolite.
16.22_392.2909n	Chenodeoxycholic acid	Bile acids, alcohols and derivatives	A dihydroxy-5β-cholanic acid.
16.66_413.0736m/z	Portulacaxanthin II	Amino acids, peptides, and analogues	A tyrosine derivative.
17.84_487.1772m/z	N-Acetyl-L-threonyl-L-prolyl-L-seryl-L-proline	Amino acids, peptides, and analogues	An oligopeptide.
18.03_313.1782m/z	sinularolide C	Macrolides and analogues	A cembrane diterpenoid isolated from Sinularia gibberosa and has been found to exhibit antineoplastic activity.
18.12_191.0849m/z	8H-cyclopenta[a]acenaphthylene	Naphthalenes	A polycyclic arene.
18.13_339.2661m/z	(2Z,6E,10E)-3-Allyl-7,11,15-trimethyl-2,6,10,14-hexadecatetraen-1-ol	Diterpenoids
18.21_307.1016m/z	Glucinol	Carbohydrates and carbohydrate conjugates	An O-glycosyl compound.
18.63_450.2981m/z	Methyl (10Z)-9-oxo-10-phenyl-10-octadecenoate	Styrenes
18.63_434.2670m/z	Salinilactam/ Micromonolactam	Cyclic carboximidic acids
18.86_345.2035m/z	smaditerpenic acid C	Acyclic diterpenic acids	Plant metabolite, a diterpenoid isolated from the leaves of Smallanthus sonchifolius.
19.00_342.2031n	L-Arginyl-L-alanyl-D-proline	Amino acids, peptides, and analogues	An oligopeptide.
19.21_439.2222m/z	Cyclipostin N / Salinipostin K	Gamma butyrolactones
19.63_588.3878m/z	Concentricol B	Triterpenoids	A squalene-type triterpenoid from the ascomycete Daldinia concentrica.
19.66_479.3141m/z	Milbemycin β12	Milbemycins
19.67_411.2876m/z	Kobiin	Alcohols and polyols
20.25_399.2195m/z	emetan	Quinolizidines

## Sheet: Sheet2
Chemical Classifications
1-benzopyrans
1-benzopyrans
1-hydroxy-2-unsubstituted benzenoids
1-hydroxy-2-unsubstituted benzenoids
2-benzopyrans
Acyclic diterpenic acids
Alcohols and polyols
Alloxazines and isoalloxazines
Amino acids and derivatives
Amino acids and derivatives
Amino acids, peptides, and analogues
Amino acids, peptides, and analogues
Amino acids, peptides, and analogues
Amino acids, peptides, and analogues
Amino acids, peptides, and analogues
Amino acids, peptides, and analogues
Amino acids, peptides, and analogues
Amino acids, peptides, and analogues
Amino acids, peptides, and analogues
Amino acids, peptides, and analogues
Amino acids, peptides, and analogues
Amino acids, peptides, and analogues
Amino acids, peptides, and analogues
Amino acids, peptides, and analogues
Amino acids, peptides, and analogues
Amino acids, peptides, and analogues
Amino acids, peptides, and analogues
Amino acids, peptides, and analogues
Amino acids, peptides, and analogues
Amino fatty acids
An oxo seco-steroid
Benzimidazole ribonucleosides and ribonucleotides
Benzodiazines
Benzofurans
Benzoic acids and derivatives
Bile acids, alcohols and derivatives
Carbohydrates and carbohydrate conjugates
Carbohydrates and carbohydrate conjugates
Carbohydrates and carbohydrate conjugates
Carbohydrates and carbohydrate conjugates
Carbohydrates and carbohydrate conjugates
Carbohydrates and carbohydrate conjugates
Carbohydrates and carbohydrate conjugates
Carbohydrates and carbohydrate conjugates
Carbohydrates and carbohydrate conjugates
Carbohydrates and carbohydrate conjugates
Carbohydrates and carbohydrate conjugates
Carbonyl compounds
Cinnamic acid esters
Cyclic carboximidic acids
Cyclic depsipeptides
Cytochalasins
Depsipeptides
Depsipeptides
Depsipeptides
Diterpenoids
Epothilones and analogues
Fatty acyl glycosides
Fatty acyl glycosides
Fatty acyl thioesters
Fatty alcohols
Fatty alcohols
Gamma butyrolactones
Guanidines
Imidazoles
Macrolides and analogues
Macrolides and analogues
Macrolides and analogues
Macrolides and analogues
Milbemycins
Monoterpenoids
Monoterpenoids
Naphthalenes
Naphthofurans
Naphthopyranones
Naphthopyranones
Organothiophosphorus compounds
Oxepanes
Pentacarboxylic acids and derivatives
Phenethylamines
Phenol ethers/ Anisoles
Phenylpropanoic acids
Piperazines
Purine nucleosides
Purine nucleosides
Pyrazoles
Pyrimidine 2'-deoxyribonucleosides
Quinolizidines
Retinoids
Secondary alcohols
Sesquiterpenoids
Steroid esters
Steroidal glycosides
Styrenes
Tetrahydropyridines
Tetralins
Triterpenoids
Triterpenoids
Vitamin D3 and derivatives
